# Supplementary material for: Genome-wide discovered psychosis-risk gene ZNF804A impacts on white matter microstructure in health, schizophrenia and bipolar disorder
Source: PeerJ. 2016 Feb 25;4:e1570. doi: 10.7717/peerj.1570 (PMC4782689; doi:10.7717/peerj.1570)
Supplement: Supplemental Information 1 [file peerj-04-1570-s001.xlsx]

## Sheet: Sheet1
Diagnosis	Genotype	Age	Sex	Ethnicity
SCZ	AA	37	1	Black Carribean
Cont	CC	29	1	Central Asian
Cont	AA	57	1	White
Cont	AA	25	1	White
SCZ	AA	40	1	Black African
Cont	CA	36	1	White
SCZ	CC	22	1	White
Cont	CA	25	1	Central Asian
Cont	CA	27	1	White
SCZ	AA	42	1	Other
SCZ	CC	45	1	White
Cont	AA	48	1	White
Cont	AA	23	0	Black Carribean
SCZ	AA	18	0	White
Cont	CA	36	1	Eastern Asian
SCZ	AA	46	1	Central Asian
Cont	AA	32	1	White
Cont	CC	19	1	White
Cont	CA	38	1	White
SCZ	AA	33	1	Black Carribean
SCZ	CA	20	1	Central Asian
Cont	CA	49	1	Central Asian
SCZ	CC	33	0	White
Cont	CC	32	1	White
Cont	CA	35	1	Eastern Asian
SCZ	CA	26	1	Central Asian
Cont	CA	33	1	White
SCZ	AA	48	1	White
SCZ	CA	29	1	Mixed Race
SCZ	AA	32	1	White
SCZ	AA	28	1	Black Carribean
SCZ	AA	27	1	Black Carribean
SCZ	AA	44	1	White
Cont	AA	39	1	Black Carribean
Cont	AA	38	1	Black African
Cont	CA	40	0	White
Cont	CA	33	1	White
Cont	CA	32	1	White
Cont	CA	29	0	White
Cont	CA	32	1	White
Cont	AA	32	0	White
SCZ	CC	53	1	White
Cont	CA	27	1	White
Cont	CA	47	1	White
Cont	AA	35	1	White
Cont	AA	59	1	White
SCZ	CA	37	1	White
Cont	CA	62	0	White
Cont	AA	20	0	White
SCZ	AA	56	1	White
SCZ	AA	42	0	White
SCZ	CA	43	0	White
SCZ	CA	31	1	White
Cont	CA	61	1	White
SCZ	AA	51	1	White
SCZ	AA	33	1	White
Cont	AA	55	1	White
Cont	AA	52	1	White
SCZ	CA	34	1	White
Cont	CA	62	0	White
Cont	CA	58	1	White
SCZ	CA	26	0	White
SCZ	AA	58	1	White
SCZ	CC	48	1	White
Cont	AA	49	1	White
Cont	CC	43	0	White
Cont	AA	59	1	White
Cont	AA	54	0	White
SCZ	CC	50	1	White
Cont	AA	42	0	White
SCZ	AA	25	1	White
SCZ	CA	42	0	White
BIP	CA	33	1	White
BIP	CA	56	1	White
BIP	CA	34	1	White
BIP	CC	39	1	White
Cont	CA	42	0	White
BIP	CA	32	0	White
BIP	CA	39	0	White
BIP	CA	59	1	White
BIP	AA	50	0	White
Cont	AA	55	0	White
Cont	AA	28	0	White
BIP	CA	43	1	White
BIP	CA	32	0	White
BIP	AA	40	1	White
Cont	AA	60	0	White
Cont	AA	46	0	White
Cont	CC	45	1	White
Cont	CA	35	1	White
BIP	AA	62	1	White
Cont	AA	26	1	White
Cont	CA	43	1	White
BIP	CA	38	1	White
BIP	CA	37	0	White
BIP	CC	51	0	White
Cont	CC	63	0	White
BIP	CC	52	0	White
Cont	AA	33	1	White
BIP	CA	56	0	White
Cont	CC	62	1	White
Cont	AA	27	1	Central Asian
Cont	AA	32	1	White
Cont	AA	25	1	White
Cont	AA	31	1	White
Cont	CA	21	1	Other
SCZ	AA	24	1	Black African
Cont	AA	24	1	White
SCZ	CA	34	1	White
SCZ	CA	21	1	Black African
SCZ	AA	24	1	Black African
Cont	CA	19	1	White
Cont	AA	30	1	Black African
Cont	AA	29	1	Black African
Cont	CA	30	1	Other
SCZ	AA	18	1	Black Carribean
SCZ	CA	22	0	Mixed Race
Cont	AA	24	1	Black Carribean
Cont	CA	35	0	White
SCZ	AA	34	1	Black Carribean
SCZ	CA	23	1	Black African
SCZ	CA	21	1	White
SCZ	CA	26	1	White
SCZ	CA	22	1	White
Cont	CA	34	1	White
Cont	CA	23	1	White
BIP	AA	42	0	White
BIP	AA	21	0	White
Cont	AA	40	0	White
Cont	AA	33	0	White
Cont	AA	33	0	White
BIP	AA	63	1	White
BIP	CA	42	1	White
BIP	AA	54	1	White
BIP	AA	55	0	White
BIP	CC	23	0	White
BIP	AA	25	0	White
BIP	AA	50	1	White
BIP	CA	28	0	White
Cont	AA	28	1	White
Cont	CA	50	0	White
BIP	AA	51	0	White
BIP	AA	54	0	White
Cont	AA	20	0	Black African
Cont	CA	36	0	White
BIP	AA	22	0	Black African
Cont	AA	35	0	White
BIP	CC	50	1	White
BIP	CC	36	0	White
Cont	CA	22	0	White
BIP	AA	22	1	White
Cont	AA	46	0	Black Carribean
Cont	CA	33	0	White
Cont	CA	24	0	White
BIP	AA	22	0	Black African
BIP	CA	42	1	White
Cont	AA	42	0	White
Cont	CA	50	1	White
Cont	AA	21	0	Mixed Race
BIP	CA	28	0	White
Cont	CA	27	0	White
BIP	CA	27	1	White
Cont	AA	22	1	White
BIP	CC	43	0	White
Cont	CA	30	0	White
BIP	CC	37	0	White
BIP	AA	46	1	White
BIP	AA	24	0	Black Carribean
Cont	AA	28	0	White
Cont	AA	26	0	White
BIP	AA	57	0	White
Cont	CA	36	0	White
Cont	CA	51	0	White
Cont	AA	55	1	White
BIP	AA	49	0	White
Cont	AA	28	0	White
Cont	AA	58	1	White
Cont	AA	57	0	White
Cont	CC	30	0	White
Cont	AA	62	0	White
Cont	CA	54	0	White
Cont	CA	25	0	White
Cont	CC	36	0	White
Cont	CC	60	1	White
Cont	CA	53	0	White
Cont	AA	55	1	White
Cont	CC	47	0	White
SCZ	CA	42	1	White
SCZ	CA	46	1	White
SCZ	CA	27	1	White
Cont	AA	38	1	White
SCZ	CC	27	0	White
SCZ	AA	30	1	White
Cont	CA	47	1	White
Cont	AA	35	1	White
Cont	CA	37	1	White
SCZ	AA	22	1	White
SCZ	AA	33	0	White
SCZ	CA	26	1	White
SCZ	CA	46	0	White
SCZ	CA	21	0	White
SCZ	CA	23	1	White
SCZ	CA	26	1	White
SCZ	CA	27	1	White
Cont	AA	24	0	White
Cont	CA	25	1	White
SCZ	CA	38	1	White
SCZ	AA	60	0	White
SCZ	CA	29	1	White
Cont	CA	21	1	White
Cont	CC	45	0	White
Cont	CA	22	0	White
SCZ	AA	32	1	White
Cont	CA	24	1	White
SCZ	AA	30	0	White
SCZ	CA	40	1	White
SCZ	CC	35	1	White
Cont	CA	19	0	White
Cont	AA	19	0	Eastern Asian
Cont	AA	19	1	White
Cont	CC	20	1	White
Cont	CA	18	0	White
Cont	CA	19	1	White
Cont	AA	17	0	White
Cont	AA	18	1	Black African
Cont	AA	18	0	White
Cont	AA	18	0	White
Cont	CA	19	0	Black African
Cont	AA	19	0	White
Cont	CC	18	0	White
